# Supplementary material for: Robust, malleable, degradable, self-healable, weldable and recyclable polyimine thermosets from natural peach gum and chitosan
Source: Royal Society of Chemistry journal article supplement (doi:10.1039/d4py00473f), 2024-01-01
Supplement: d4py00473f1.pdf [file d4py00473f1.pdf]

## Supplementary Information

### Robust, malleable, degradable, self-healable, weldable and recyclable polyimine thermosets from natural peach gum and chitosan

Ningning Zhang,<sup>a</sup> Xianjie Pan,<sup>a</sup> Aoqian Xi,<sup>a</sup> Wenpei Chen,<sup>a</sup> Ting Huang,<sup>a</sup>  
Yanning Zeng<sup>a\*</sup>

<sup>a</sup> College of Material Science and Engineering, Guilin University of Technology,  
Guilin 541004, P. R. China

\* Corresponding author, E-mail: [ynzeng@glut.edu.cn](mailto:ynzeng@glut.edu.cn)

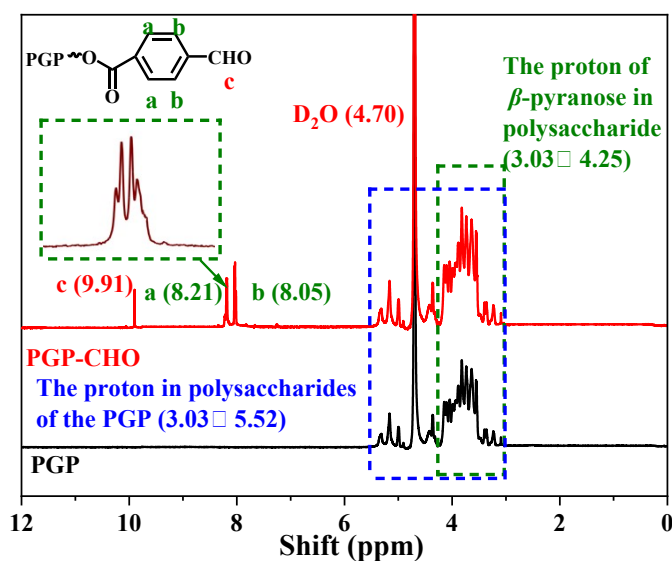

Fig.S1. <sup>1</sup>H NMR spectra of PGP-CHO and PGP.

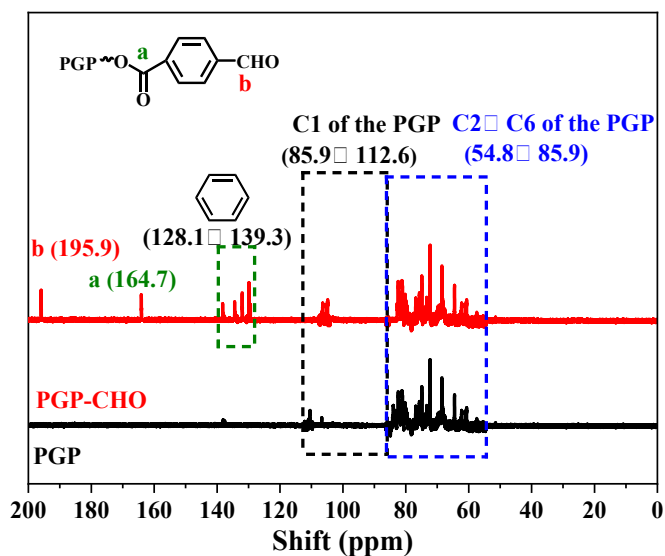

Fig.S2. <sup>13</sup>C NMR spectra of PGP-CHO and PGP.

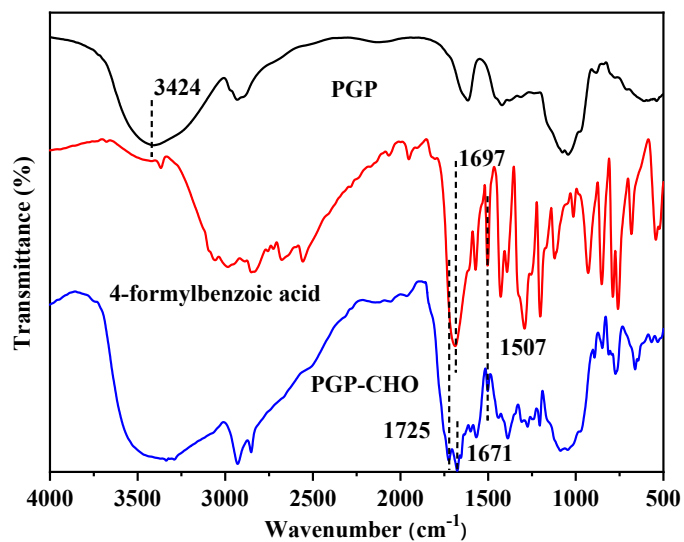

**Fig. S3.** FTIR spectra of PGP, 4-formylbenzoic acid and PGP-CHO.

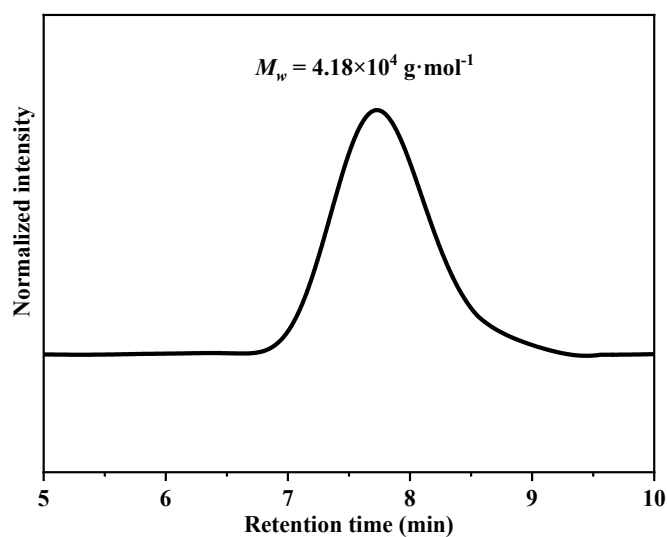

**Fig. S4.** GPC profile of the PGP-CHO.

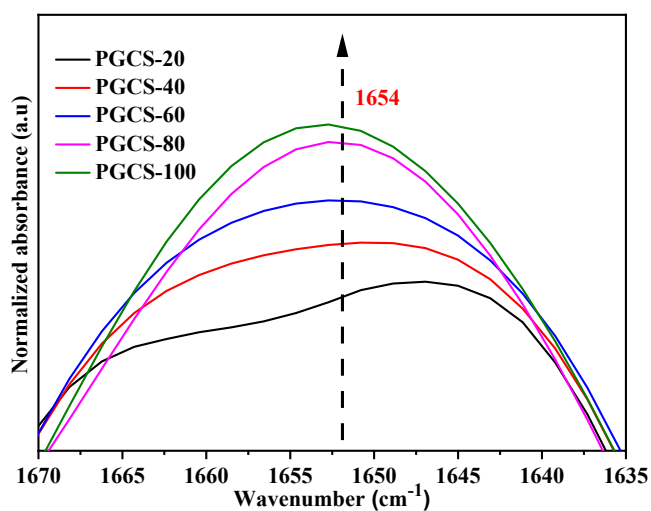

**Fig. S5.** Normalized FTIR spectra of PGCS-x at a range from 1670 to 1635  $\text{cm}^{-1}$ .

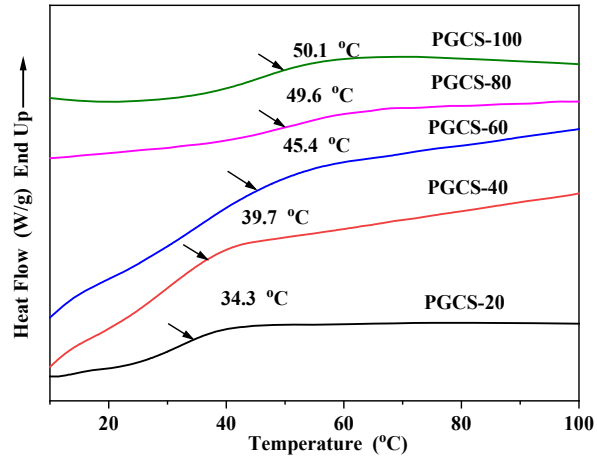

Fig. S6. DSC plots of PGCS-x

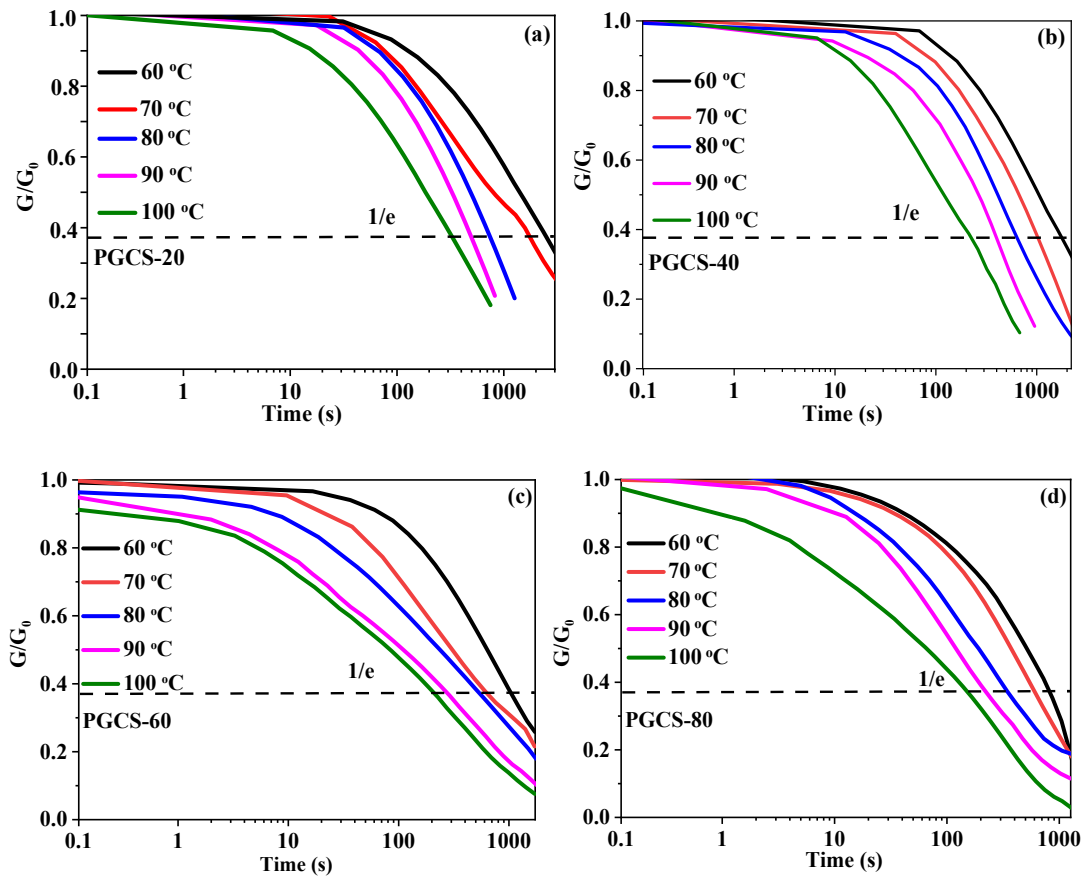

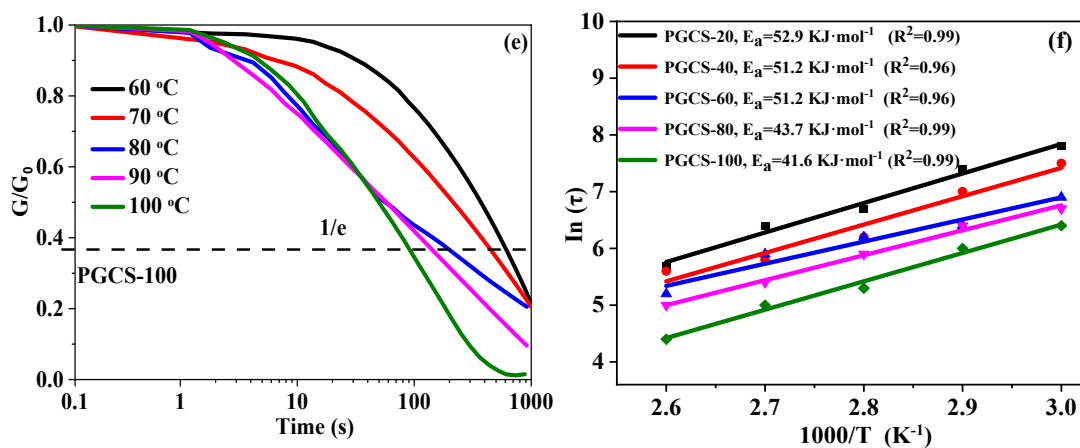

**Fig. S7.** (a) PGCS-20 at 60/70/80/90/100 °C; (b) PGCS-40 at 60/70/80/90/100 °C; (c) PGCS-60 at 60/70/80/90/100 °C; (d) PGCS-80 at 60/70/80/90/100 °C; (e) PGCS-100 at 60/70/80/90/100 °C; (f) Arrhenius fitting plot of PGCS-x.

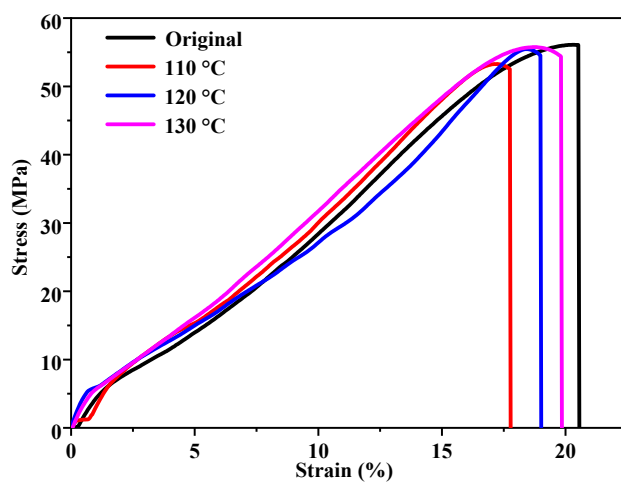

**Fig. S8.** Stress-strain curves of the PGCS-100 after self-healing for 60 min

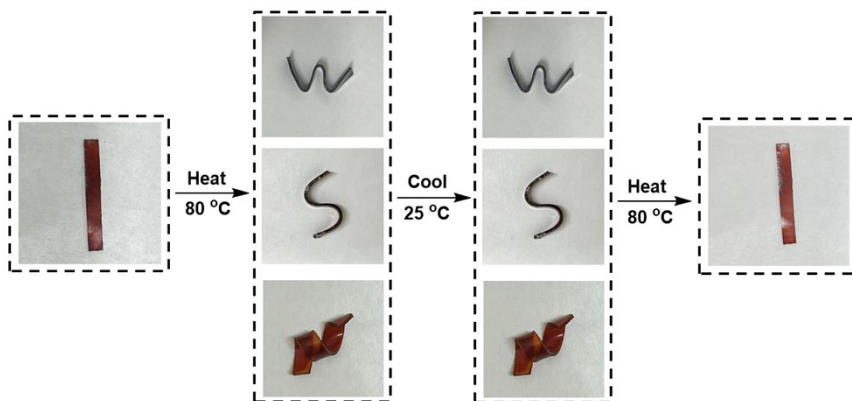

**Fig. S9.** Shape memory performances of PGCS-100

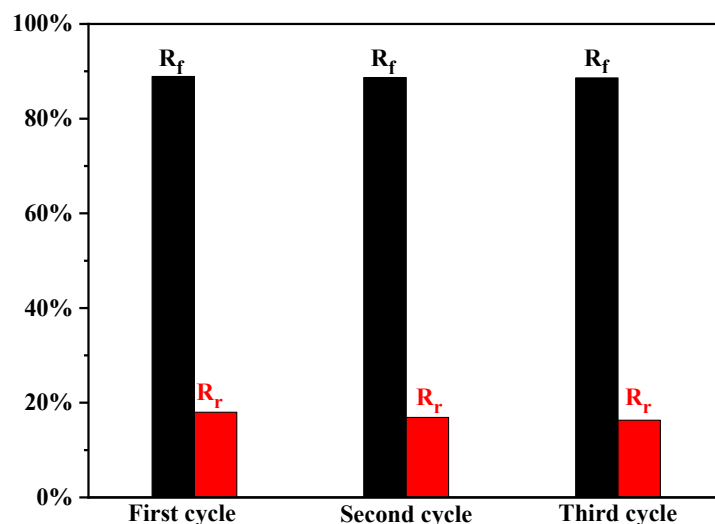

Fig. S10. R<sub>f</sub> and R<sub>r</sub> values over three shape memory cycles of PGCS-100

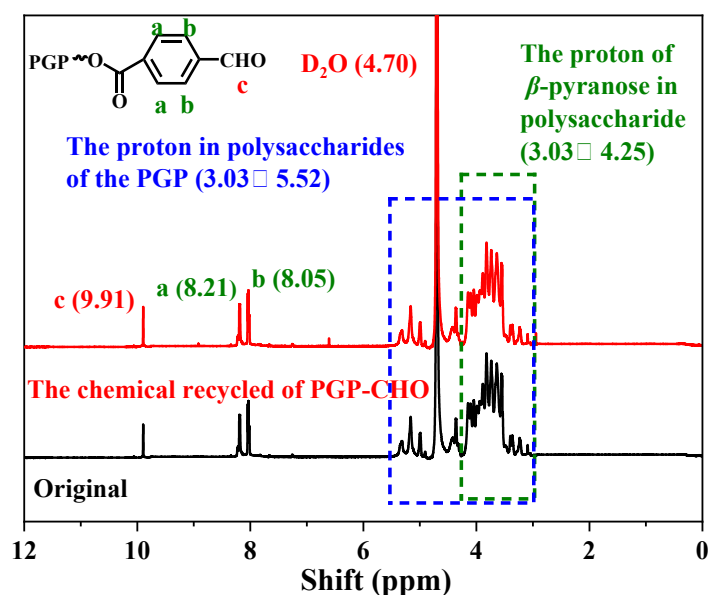

Fig. S11. <sup>1</sup>H NMR spectra of the recycled PGP-CHO.

Table S1 Comparison of thermal, mechanical and thermomechanical properties in this work and in literatures.

|           | Bio-based resources   | Tensile strength (MPa) | Young's modulus (MPa) | T <sub>g</sub> (°C) | E <sub>a</sub> (KJ·mol <sup>-1</sup> ) |
|-----------|-----------------------|------------------------|-----------------------|---------------------|----------------------------------------|
| This Work | Peach Gum / Chitosan  | 56.5                   | 439                   | 79.7                | 41.6                                   |
| Ref 16    | Fructose / Plant oil  | 0.69                   | 4.4                   | -10                 | 64                                     |
| Ref 4     | Vanillin / Castor oil | 5.21                   | 21.8                  | -7.5                | –                                      |
| Ref 18    | Vanillin / Plant oil  | 1.04                   | –                     | -5.0                | 57.12                                  |
| Ref 15    | Lignin / Plant oil    | 2.77                   | 117                   | 110                 | –                                      |
